# Supplementary material for: An extensive theoretical survey of low-density allotropy in silicon
Source: Royal Society of Chemistry journal article supplement (doi:10.1039/c004375c), 2010-01-01
Supplement: c004375c.pdf [file c004375c.pdf]

Supporting information for:

**An extensive theoretical survey of low-density allotropy in silicon**

M.A. Zwijnenburg<sup>a</sup>, Kim E. Jelfs<sup>a, b</sup>, S.T. Bromley<sup>a, c</sup>

<sup>a</sup> *Departament de Química Física and Institut de Química Teòrica i Computacional, Universitat de Barcelona, E-08028 Barcelona, Spain*

<sup>b</sup> *University College London, Department of Chemistry, Christopher Ingold Laboratories, 20 Gordon Street, London WC1H 0AJ, U.K.*

<sup>c</sup> *Institució Catalana de Recerca i Estudis Avançats (ICREA), 08010 Barcelona, Spain*

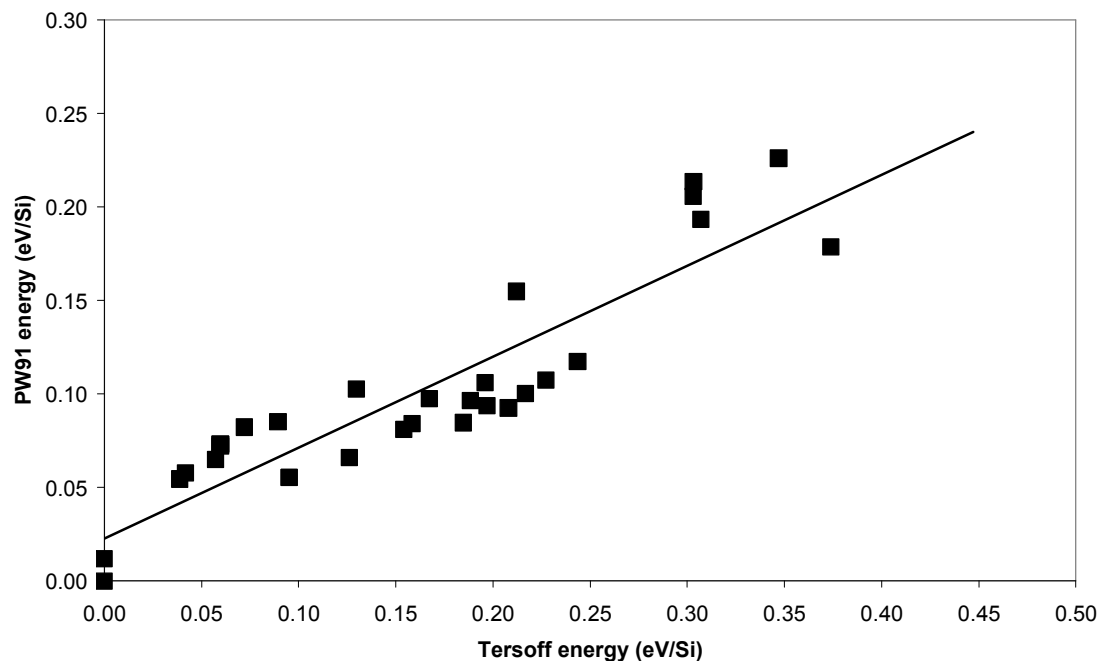

**Fig. S1** Tersoff potential calculated energies with respect to diamond for a range of silicon structures plotted against their PW91 calculated counterparts. The range of structures considered included the 5-6 clathrates, the structures taken from Conesa (including *ngs*) and the structures based on known zeolites. The  $R^2$  value of the linear fit obtained (line shown) is 0.82.

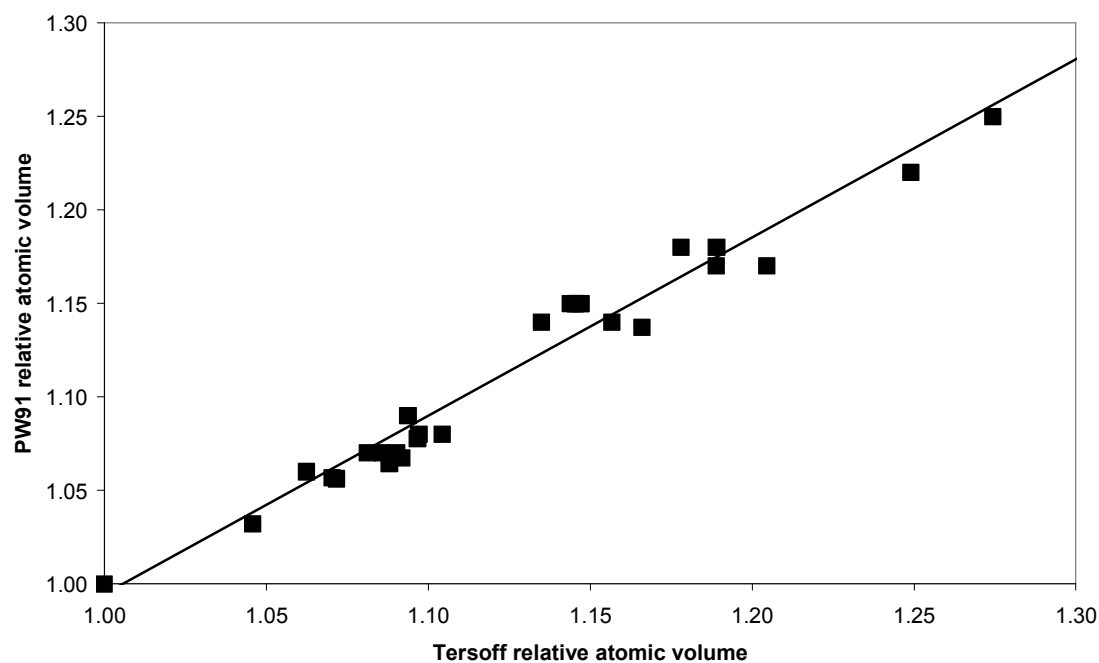

**Fig. S2** Tersoff potential calculated relative atomic volumes with respect to diamond for a range of silicon structures plotted against their PW91 calculated counterparts. The range of structures considered is the same as for Fig. S1. The  $R^2$  value of the linear fit obtained (line shown) is 0.96.
